# Supplementary material for: Efficacy Analysis of Minimally Invasive Intramedullary Calcaneal Nail and Extensile Lateral Approach Plate Internal Fixation in the Treatment of Sanders Type II-III Calcaneal Fractures
Source: Research Square preprint supplement (doi:10.21203/rs.3.rs-8208899/v1), 2025-12-02
Supplement: Supplementary file 1 [file 053bdcf8300739df0d614b12.docx]

| **Variable** | **Nail group**  **(n = 40)** | **Plate group**  **(n = 40)** | **Test statistic** | **P** |
| --- | --- | --- | --- | --- |
| **Age (years)** | 42.12 ± 4.05 | 42.54 ± 4.21 | t = 0.455 | 0.651 |
| **Sex (male/female)** | 30 / 10 | 34 / 6 | χ² = 1.25 | 0.263 |
| **BMI (kg/m²)** | 25.8 ± 2.6 | 25.4 ± 2.9 | t = 0.639 | 0.525 |
| **Smoking (yes/no)** | 12 / 28 | 15 / 25 | χ² = 0.48 | 0.488 |
| **Soft-tissue condition (good/moderate)** | 38 / 2 | 37 / 3 | χ² = 0.21 | 0.646 |
| **Time from injury to surgery (days)** | 4.8 ± 1.9 | 5.1 ± 2.1 | t = 0.63 | 0.530 |
| **Sanders subtype (II / III)** | 18 / 22 | 10 / 30 | χ² = 3.52 | 0.061 |
| **Injury mechanism** | Fall: 28  Traffic: 10  Other: 2 | Fall: 29  Traffic: 10  Other: 1 | χ² = 0.351 | 0.839 |
| **Preoperative Böhler Angle (°)** | 12.61 ± 5.82 | 12.08 ± 5.93 | 0.412 | 0.681 |
| **Healthy-Side Böhler Angle (°)** | 31.2 ± 2.5 | 30.8 ± 2.7 | 0.614 | 0.521 |
| **Preoperative Gissane Angle (°)** | 101.34 ± 7.26 | 102.15 ± 6.89 | 0.463 | 0.645 |
| **Soft Tissue Condition (Good/Poor)** | 35/5 | 33/7 | 0.453 | 0.501 |
| **Time from Injury to Surgery (days)** | 5.2±1.8 | 5.5 ± 2.1 | 0.734 | 0.465 |

**Table 1 Baseline Characteristics of Patients in Two Groups (x̅±s / n, %)**
