# Supplementary material for: Efficacy Analysis of Minimally Invasive Intramedullary Calcaneal Nail and Extensile Lateral Approach Plate Internal Fixation in the Treatment of Sanders Type II-III Calcaneal Fractures
Source: Research Square preprint supplement (doi:10.21203/rs.3.rs-8208899/v1), 2025-12-02
Supplement: Supplementary file 2 [file 05e2ca0b5608d3fa9c25784a.docx]

| **ariables** | **Nail Group (n=40)** | **Plate Group (n=40)** | **t** | **P** |
| --- | --- | --- | --- | --- |
| Operation Time (min) | 51.64 ± 11.59 | 78.48 ± 8.59 | 12.876 | <0.001 |
| Intraoperative Blood Loss (ml) | 18.92 ± 3.62 | 32.04 ± 6.05 | 11.342 | <0.001 |
| Fluoroscopy Frequency (times) | 6.32 ± 1.24 | 9.88 ± 1.28 | 12.093 | <0.001 |
| Hospital Stay (days) | 6.4 ± 1.1 | 9.7 ± 2.3 | 8.965 | <0.001 |

**Table 2：Surgical status and comparison of the two groups（±*s*）**
