# Supplementary material for: Efficacy Analysis of Minimally Invasive Intramedullary Calcaneal Nail and Extensile Lateral Approach Plate Internal Fixation in the Treatment of Sanders Type II-III Calcaneal Fractures
Source: Research Square preprint supplement (doi:10.21203/rs.3.rs-8208899/v1), 2025-12-02
Supplement: Supplementary file 3 [file 758e5aa276ba38078c585040.docx]

| **ariables** | **Nail Group (n=40)** | **Plate Group (n=40)** | **t/χ²** | ***P*** |
| --- | --- | --- | --- | --- |
| VAS Score (2 days postoperatively) | 2.4 ± 0.9 | 3.9 ± 1.2 | 6.872 | <0.001 |
| AOFAS Score (12 months postoperatively) | 88.5 ± 5.1 | 79.3 ± 7.4 | 6.435 | <0.001 |
| Excellent-to-Good Rate(12 months) | 35 (87.5%) | 29 (72.5%) | 4.219 | 0.042 |
| Excellent  (90–100 points) | 20 (50.0%) | 14 (35.0%) |  |  |
| Good (80–89 points) | 15 (37.5%) | 15 (37.5%) |  |  |
| Fair (70–79 points) | 4 (10.0%) | 8 (20.0%) |  |  |
| Poor (<70 points) | 1 (2.5%) | 4 (10.0%) |  |  |

**Table 4：Comparing the postoperative AOFAS score with the VAS score in both groups（±*s*）**
