# Supplementary material for: Efficacy Analysis of Minimally Invasive Intramedullary Calcaneal Nail and Extensile Lateral Approach Plate Internal Fixation in the Treatment of Sanders Type II-III Calcaneal Fractures
Source: Research Square preprint supplement (doi:10.21203/rs.3.rs-8208899/v1), 2025-12-02
Supplement: Supplementary file 4 [file 94f805184a4448fdb58779f4.docx]

| **Variables** | **Time Point** | **Nail Group (n=40)** | **Plate Group (n=40)** | **Inter-group**  **P Value** | **Intra-group**  **P Value** |
| --- | --- | --- | --- | --- | --- |
| Böhler Angle (°) | Preoperative | 12.61 ± 5.82 | 12.08 ± 5.93 | 0.681 | <0.001 |
| Postoperative | 29.35 ± 2.82 | 28.49 ± 3.24 | 0.186 | <0.001 |
| Normal side | 2.1 ± 1.3 | 3.5 ± 1.8 | 0.002 | - |
| Gissane Angle (°) | Preoperative | 101.34 ± 7.26 | 102.15 ± 6.89 | 0.645 | <0.001 |
| Postoperative | 124.17 ± 3.93 | 123.86 ± 3.64 | 0.652 | <0.001 |
| Normal side | .8 ± 1.1 | 2.9 ± 1.5 | 0.003 | - |
| Calcaneal Length (mm) | Preoperative | 78.2 ± 4.1 | 77.8 ± 4.3 | 0.658 | <0.001 |
| Postoperative | 85.6 ± 3.2 | 84.9 ± 3.5 | 0.321 | <0.001 |
| Normal side | 0.9 ± 0.6 | 1.7 ± 0.8 | <0.001 | - |
| Calcaneal Width (mm) | Preoperative | 43.5 ± 3.2 | 44.1 ± 3.1 | 0.387 | <0.001 |
| Postoperative | 38.2 ± 2.1 | 37.8 ± 2.3 | 0.412 | <0.001 |
| Normal side | 0.7 ± 0.4 | 1.4 ± 0.6 | <0.001 | - |
| Calcaneal Height (mm) | Preoperative | 32.1 ± 3.5 | 31.8 ± 3.7 | 0.724 | <0.001 |
| Postoperative | 38.6 ± 2.4 | 38.1 ± 2.6 | 0.356 | <0.001 |
| Normal side | 0.8 ± 0.5 | 1.5 ± 0.7 | <0.001 | - |

**Table 3：Comparison of two sets of imaging data（±*s*）**

| classification | observation group （n=40） | control group（n=40） | ***t*** | ***p*** |
| --- | --- | --- | --- | --- |
| Böhler horn （°） |  | | | |
| Preoperative | 12.61 ± 5.82 | 12.08 ± 5.93 | 0.681 | <0.001 |
| Postoperative | 29.85±3.11 | 28.49 ± 3.24 | 0.186 | <0.001 |
| Gissane horn （°） |  | | | |
| Preoperative | 101.34 ± 7.26 | 102.15 ± 6.89 | 0.645 | <0.001 |
| Postoperative | 124.17 ± 3.93 | 123.86 ± 3.64 | 0.652 | <0.001 |
| Heel width（mm） |  | | | |
| Preoperative | 43.5 ± 3.2 | 44.1 ± 3.1 | 0.387 | <0.001 |
| Postoperative | 38.2 ± 2.1 | 37.8 ± 2.3 | 0.412 | <0.001 |
| Heter height（mm） |  | | | |
| Preoperative | 31.43±3.12 | 31.50±2.99 | 0.102 | <0.001 |
| Postoperative | 46.37±4.57 | 46.45±4.60 | 0.078 | <0.001 |
| calcaneal length（mm） |  | | | |
| Preoperative | 78.2 ± 4.1 | 77.8 ± 4.3 | 0.658 | <0.001 |
| Postoperative | 85.6 ± 3.2 | 84.9 ± 3.5 | 0.321 | <0.001 |
